# Supplementary material for: mTOR Inhibitors Modulate the Physical Properties of 3D Spheroids Derived from H9c2 Cells
Source: MDPI journal article supplement (doi:10.3390/ijms241411459), 2023-07-14
Supplement: s1 [file s1]

**Supplemental Table S1 Sequences of primers of qPCR**

| Sequence               |         |                                                       | Exon<br>Location | RefSeq<br>Number |
|------------------------|---------|-------------------------------------------------------|------------------|------------------|
| rat<br>RPLP0           | Probe   | 5'-/56-FAM/CCTGTCTTC/ZEN/CCTGGGCATCACG/3IABkFQ/-3'    | 1-2              | NM_022402        |
|                        | Primer2 | 5'-TGTCTGCTCCCACAATGAAG-3'                            |                  |                  |
|                        | Primer1 | 5'-CAATCCCTGACGCACCG-3'                               |                  |                  |
| rat COL1A1             | Probe   | 5'-/56-FAM/CCGGAGGTC/ZEN/CACAAAGCTGAACA/3IABkFQ/-3'   | -                | NM_053304        |
|                        | Primer2 | 5'-CATTGTGTATGCAGCTGACTTC-3'                          |                  |                  |
|                        | Primer1 | 5'-CGCAAAGAGTCTACATGTCTAGG-3'                         |                  |                  |
| rat COL4A1             | Probe   | 5'-/TCACCTTTC/ZEN/TGACCTTTTCTCCTGTTG/3IABkFQ/-3'      | 13-15            | NM_001135009     |
|                        | Primer2 | 5'-GTTACCTTTCTCTCCATATCCTG-3'                         |                  |                  |
|                        | Primer1 | 5'-GGACAGGCACAAGTTAAGGAA-3'                           |                  |                  |
| rat COL6A1             | Probe   | 5'-/56-FAM/CAGGTTGCG/ZEN/GTCACATCGGTAGT/3IABkFQ/-3'   | 2-3              | XM_215375        |
|                        | Primer2 | 5'-ATCTCCACCTCGTCACTGTA-3'                            |                  |                  |
|                        | Primer1 | 5'-CCTTTACCAAGCGTTTCATCG-3'                           |                  |                  |
| rat<br>FN1             | Probe   | 5'-/56-FAM/CGCCGTGGT/ZEN/CCTAACAAATCTCCTG/3IABkFQ/-3' | 26-27            | NM_019143        |
|                        | Primer2 | 5'-GATGCTCTCATGCTGTTTCGA-3'                           |                  |                  |
|                        | Primer1 | 5'-CGCCGTGGT/ZEN/CCTAACAAATCTCCTG-3'                  |                  |                  |
| rat<br>$\alpha$ SMA    | Probe   | 5'-/56-FAM/ACGACATGG/ZEN/AAAAGATCTGGCACCA/3IABkFQ/-3' | 3-4              | NM_031004        |
|                        | Primer2 | 5'-ACGCGAAGCTCGTTATAGAAG-3'                           |                  |                  |
|                        | Primer1 | 5'-GACCCTGAAGTATCCGATAGAAC-3'                         |                  |                  |
| rat<br>Cx43            | Probe   | 5'-/56-FAM/AGTGAAAGA/ZEN/GAGGTGCCCAGACATG/3IABkFQ/-3' | 1-2              | NM_012567        |
|                        | Primer2 | 5'-GGTGGAGTAGGCTTGGAC-3'                              |                  |                  |
|                        | Primer1 | 5'-CCTTTGACTTCAGCCTCCAA-3'                            |                  |                  |
| rat<br>ZO1             | Probe   | 5'-/56-FAMCATCCGCCT/ZEN/TCCCCTCAGAGAC/3IABkFQ/-3'     | 17-18            | NM_001106266     |
|                        | Primer2 | 5'-ACAGGTAGGACAGACGATCA-3'                            |                  |                  |
|                        | Primer1 | 5'-TCAGCAGCAACAGAACCAG-3'                             |                  |                  |
| rat<br>$\beta$ catenin | Probe   | 5'-/56-FAM/ACGCCCTCC/ZEN/ACGAACTGC/3IABkFQ/-3'        | 9-10             | NM_053357        |
|                        | Primer2 | 5'-ACCCTTCAACTATCTCCTCCA-3'                           |                  |                  |
|                        | Primer1 | 5'-GTACGAGCACATCAGGACAC-3'                            |                  |                  |
| rat<br>N cadherin      | Probe   | 5'-/56-FAM/TCCCGGCGT/ZEN/TTCATCCATACCAC/3IABkFQ/-3'   | 14-15            | NM_031333        |
|                        | Primer2 | 5'-CCTCTCCTCCACCTTCTTCA-3'                            |                  |                  |
|                        | Primer1 | 5'-GCTGATCCTTGTCCTCATGT-3'                            |                  |                  |
| rat<br>STAT3           | Probe   | 5'-/56-FAM/TCGACCTAG/ZEN/AGACCCACTCCTTGC/3IABkFQ/-3'  | 14-16            | NM_012747        |
|                        | Primer2 | 5'-CTGACAGATGTTGGAGATCACC-3'                          |                  |                  |
|                        | Primer1 | 5'-TGTGATGCCTCCTTGATTGTC-3'                           |                  |                  |
| rat<br>HIF1A           | Probe   | 5'-/ATACCAGCA/ZEN/GTAACCAGCCGCA/3IABkFQ/-3            | 5-6              | NM_024359        |
|                        | Primer2 | 5'-GTTACAAATCAGCACCAAGC-3'                            |                  |                  |
|                        | Primer1 | 5'-GAACATCAAGTCAGCAACGTG-3'                           |                  |                  |

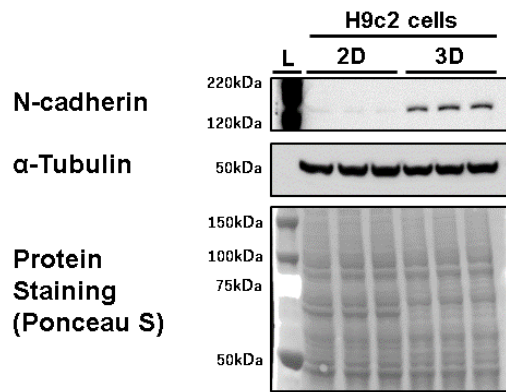

**Supplemental Figure S1. Western blot analysis of N-cadherin of 2D and 3D cultured H9c2 cells.**

Cell lysate of non-treated (NT) 2D or 3D H9c2 containing approximately 15 µg proteins was subjected to each lane of 4-12% gradient polyacrylamide gel and thereafter blotted onto a PVDF membrane (Millipore, Bedford, MA). After blocking with 5 % nonfat dry milk in TBS-T buffer, the membrane was sequentially incubated with 1<sup>st</sup> antibody (1:1000 dilution) of anti-N-cadherin rabbit polyclonal antibody (#4061, Cell Signaling Technology, Danvers, MA, U.S.A.) or anti-α-tubulin rabbit polyclonal antibody (#4074, Abcam, Cambridge, England) and 2<sup>nd</sup> antibody (1:5000 dilution) of anti-rabbit IgG/HRP-linked Antibody (#7074, Cell Signaling Technology, Danvers, MA, U.S.A.). Immunolabeling proteins were visualized by an Immobilon Western detection kit (Millipore, Billerica, MA). Representative immunolabeling and protein staining by Ponceau S of the transfer membrane are shown (n=3). L: ladder protein makers.
